# Supplementary material
Source: PubMed Central journal article supplement (PMC2718533)

**Reinfection and mixed infection cause changing *Mycobacterium tuberculosis* drug-resistance patterns.**

Annelies van Rie (PhD), Thomas C. Victor (PhD), Madalene Richardson (MSc),  
Rabia Johnson (MSc), Gian D. van der Spuy (MSc), Emma J. Murray  
(BSocSci(Hon)), Nulda Beyers (PhD), Nico C. Gey van Pittius (PhD), Paul D. van  
Helden (PhD), Robin M. Warren (PhD).

**Online Data Supplement**

## **MATERIALS AND METHODS.**

### **Cloning of IS6110 insertion sites.**

*M. tuberculosis* DNA from the respective strains were digested with RsaI and the resulting chromosomal fragments were ligated into EcoRV linearized and dephosphorylated pBluescript. The ligation reaction was then subjected to PCR amplification using the forward primer GCTCAACGCCAGAGACCAGC (complementary to the IS6110 element) in combination with the T3 primer CAATTAACCCTCACTAAAGG (complementary to the pBluescript vector). Amplification products were then subjected to a second round of amplification with a nested forward primer GGA CTCACCGGGGCGGTTC together with the T3 primer. These products were fractionated in 1% agarose and visualised after staining with ethidium bromide. The respective amplification products were extracted from the agarose and ligated into pGEM-Teasy (Promega) according to the manufacturers instructions. Positive clones were subjected to DNA sequencing to determine the points of IS6110 insertion. Primers complementary to the IS6110 insertion junctions were designed from the sequence data. Each IS6110 insertion junction primer was used together with the universal forward primer in a PCR amplification assay to determine the specificity of amplification by amplification of *M. tuberculosis* DNA from a panel of isolates representative of the 30 different strain families identified in the epidemiological field site (E1). IS6110 insertion junction primers which only produced an amplification product on amplification of the strain from which they were cloned were used in the PCR assay to determine the strain population in serial sputum cultures from patients with MDR-tuberculosis.

## FIGURE LEGENDS.

### **Figure E1. Phenotypic and genotypic characterization of sputum cultures from patients 3, 4, 5, 6, 7 and 8.**

Serial *M. tuberculosis* cultures were obtained from patients diagnosed with MDR tuberculosis. Phenotypic culture-based drug susceptibility testing was performed by the direct proportion method. Treatment regimen implemented at each visit is indicated, while adherence was measured for the period between each visit. Mutations conferring resistance were detected by DNA sequencing or PCR dot-blot (E2). All sputum cultures were genotyped by IS6110 DNA fingerprinting (E3) and the strain(s) present was randomly assigned an alphabetical designation according to their strain family classification. Presence of multiple strains in each culture was determined using strain-specific PCR amplification (1). Abbreviations: S drug sensitive; R drug resistant; nd not determined; Inh (isoniazid) ; Rif (rifampin); Pza (pyrazinamide); Emb (ethambutol); Eth (ethionamide); Kana (kanamycin); Inat (isoniazid & thiacetazone); Oflox (ofloxacin); Sm (streptomycin); Teri (terizidone); thia (thiacetazone); D default (stopped therapy for a period of > 2 months); U unknown; + mutation present; - mutation absent; \* internal positive PCR control (Rv3875).

## REFERENCES.

- E1. Warren, R. M., T. C. Victor, E. M. Streicher, M. Richardson, N. Beyers, N. C. van Pittius, and P. D. van Helden. 2004. Patients with active tuberculosis often have different strains in the same sputum specimen. *Am.J.Respir.Crit Care Med.* 169:610-614.
- E2. Victor, T. C., A. M. Jordaan, A. van Rie, G. D. van der Spuy, M. Richardson, P. D. van Helden, and R. Warren. 1999. Detection of mutations in drug resistance genes of *Mycobacterium tuberculosis* by a dot-blot hybridization strategy. *Tuber.Lung Dis.* 79:343-348.
- E3. van Embden, J. D., M. D. Cave, J. T. Crawford, J. W. Dale, K. D. Eisenach, B. Gicquel, P. Hermans, C. Martin, R. McAdam, and T. M. Shinnick. 1993. Strain identification of *Mycobacterium tuberculosis* by DNA fingerprinting: recommendations for a standardized methodology. *J.Clin.Microbiol.* 31:406-409.

**Figure E1a**

**Patient 3 (HIV neg)**

**Patient 4 (HIV neg)**

|                                         |                                | A        | B        | C        | D        | E        | F        | G        | H        | I        | J        | K        | L        | M  | A                          | B        | C        | D        | E        | F        | G        | H  |
|-----------------------------------------|--------------------------------|----------|----------|----------|----------|----------|----------|----------|----------|----------|----------|----------|----------|----|----------------------------|----------|----------|----------|----------|----------|----------|----|
| <b>Date</b>                             | <b>Dav</b>                     | U        | 25       | 20       | 16       | 29       | 05       | 09       | 31       | 29       | 04       | 15       | 05       | 14 | U                          | 14       | 09       | 20       | 21       | 28       | 05       | 08 |
|                                         | <b>Month</b>                   | 11       | 05       | 07       | 08       | 09       | 10       | 11       | 01       | 02       | 04       | 10       | 02       | 08 | 11                         | 04       | 06       | 06       | 07       | 07       | 01       | 06 |
|                                         | <b>Year</b>                    | 94       | 95       | 95       | 95       | 95       | 95       | 95       | 96       | 96       | 96       | 96       | 98       | 98 | 93                         | 94       | 94       | 94       | 94       | 94       | 95       | 95 |
| <b>Susceptibility</b> -                 | isoniazid                      | nd       | nd       | R        | R        | R        | R        | R        | S        | R        | R        | S        | R        | R  | R                          | R        | S        | R        | R        | S        | R        | R  |
|                                         | - rifampin                     | nd       | nd       | R        | R        | R        | R        | R        | S        | R        | R        | S        | R        | R  | R                          | R        | S        | R        | R        | S        | R        | R  |
|                                         | - streptomycin                 | nd       | nd       | R        | R        | R        | R        | R        | nd       | R        | R        | nd       | R        | R  | nd                         | nd       | nd       | R        | nd       | nd       | S        | R  |
|                                         | - ethambutol                   | nd       | nd       | S        | S        | S        | S        | S        | nd       | S        | S        | nd       | S        | S  | nd                         | nd       | nd       | S        | nd       | nd       | S        | R  |
| <b>Treatment</b> -                      | Rifafour ( Inh, Rif, Pza, Emb) | U        | X        | X        | X        | X        | X        |          |          |          |          |          |          |    |                            |          |          |          |          |          |          |    |
|                                         | - Rifater ( Inh, Rif, Pza)     |          |          |          |          |          |          |          |          |          |          |          |          |    | X                          |          |          |          |          |          |          |    |
|                                         | - Emb, Eth, Inat, Kana         |          |          |          |          |          |          |          | X        | X        | X        | X        | X        | X  |                            |          |          |          |          |          |          |    |
|                                         | - Emb, Eth, Inat, Kana, Teri   |          |          |          |          |          |          |          |          |          |          |          |          |    |                            | X        |          |          |          |          |          |    |
|                                         | - Eth, Inat, Kana, Teri        |          |          |          |          |          |          |          |          |          |          |          |          |    |                            |          | X        | X        | X        | X        |          |    |
|                                         | - Emb, Eth Inat,               |          |          |          |          |          |          |          |          |          |          |          |          |    |                            |          |          |          |          |          |          | X  |
|                                         | - Emb, Eth, Inat, Teri, Pza    |          |          |          |          |          |          |          |          |          |          |          |          |    |                            |          |          |          |          |          |          |    |
| <b>Adherence (%)</b>                    |                                | 87       | 79       | 90       | 90       | 95       | 99       | 71       | 79       | 53       | 49       | D        | U        |    | 83                         | 80       | 82       | 100      | 100      | 68       | 57       |    |
| <b>Point mutations</b> - <i>KatG315</i> |                                | nd       | nd       | +        | +        | +        | +        | +        | +        | +        | -        | +        | +        | nd | +                          | -        | +        | +        | +        | +        | +        |    |
|                                         | - <i>rpoB531</i>               | nd       | nd       | -        | nd       | nd       | nd       | nd       | nd       | nd       | -        | -        | -        | nd | +                          | -        | +        | +        | +        | +        | +        |    |
|                                         | - <i>rpoB516</i>               | nd       | nd       | +        | +        | +        | +        | +        | +        | +        | -        | +        | +        | nd | nd                         | -        | nd       | nd       | nd       | nd       | nd       |    |
|                                         | - <i>rpsL43</i>                | nd       | nd       | +        | +        | +        | +        | +        | +        | +        | -        | +        | +        | nd | -                          | -        | -        | -        | -        | -        | -        |    |
|                                         | - <i>rrs513</i>                | nd       | nd       | -        | -        | -        | -        | -        | -        | -        | -        | -        | -        | nd | -                          | nd       | nd       | +        | +        | +        | +        |    |
| - <i>emb306</i>                         | nd                             | nd       | nd       | nd       | nd       | nd       | nd       | nd       | nd       | nd       | -        | -        | -        | nd | +                          | -        | +        | +        | +        | +        | +        |    |
| <b>Strain designation</b>               |                                | <b>b</b> | <b>e</b> | <b>b</b> | <b>b</b> |    | <b>d</b>                   | <b>f</b> | <b>d</b> | <b>d</b> | <b>d</b> | <b>d</b> | <b>d</b> |    |
| <b>IS6110 DNA fingerprinting</b>        |                                |          |          |          |          |          |          |          |          |          |          |          |          |    |                            |          |          |          |          |          |          |    |
|                                         | <b>PCR (strain b)</b>          |          |          |          |          |          |          |          |          |          |          |          |          |    | <b>PCR (strain d)</b>      |          |          |          |          |          |          |    |
|                                         |                                |          |          |          |          |          |          |          |          |          |          |          |          |    |                            |          |          |          |          |          |          |    |
|                                         | <b>Strain-specific PCR</b>     |          |          |          |          |          |          |          |          |          |          |          |          |    | <b>Strain-specific PCR</b> |          |          |          |          |          |          |    |
|                                         |                                |          |          |          |          |          |          |          |          |          |          |          |          |    |                            |          |          |          |          |          |          |    |

**Figure E1b**

|                                  |                                              | Patient 5 (HIV nd)                                                                                                                                                                                                     |          |          |          | Patient 6 (HIV nd)                                                                                                                                                                                                     |          |          |
|----------------------------------|----------------------------------------------|------------------------------------------------------------------------------------------------------------------------------------------------------------------------------------------------------------------------|----------|----------|----------|------------------------------------------------------------------------------------------------------------------------------------------------------------------------------------------------------------------------|----------|----------|
|                                  |                                              | A                                                                                                                                                                                                                      | B        | C        | D        | A                                                                                                                                                                                                                      | B        | C        |
| <b>Date</b>                      | <b>Day</b>                                   | 03                                                                                                                                                                                                                     | 26       | 05       | 05       | 17                                                                                                                                                                                                                     | 23       | 10       |
|                                  | <b>Month</b>                                 | 06                                                                                                                                                                                                                     | 11       | 01       | 01       | 06                                                                                                                                                                                                                     | 09       | 10       |
|                                  | <b>Year</b>                                  | 93                                                                                                                                                                                                                     | 93       | 95       | 95       | 93                                                                                                                                                                                                                     | 93       | 93       |
| <b>Susceptibility</b>            | - isoniazid                                  | S                                                                                                                                                                                                                      | nd       | R        | R        | R                                                                                                                                                                                                                      | R        | R        |
|                                  | - rifampin                                   | S                                                                                                                                                                                                                      | nd       | R        | R        | R                                                                                                                                                                                                                      | R        | R        |
|                                  | - streptomycin                               | S                                                                                                                                                                                                                      | nd       | R        | R        | nd                                                                                                                                                                                                                     | R        | R        |
|                                  | - ethambutol                                 | S                                                                                                                                                                                                                      | nd       | R        | R        | nd                                                                                                                                                                                                                     | nd       | nd       |
| <b>Treatment</b>                 | - Rifater (Inh, Rif, Pza)                    | X                                                                                                                                                                                                                      |          |          |          | X                                                                                                                                                                                                                      | X        | X        |
|                                  | - Emb, Eth, Kana, Inat, Oflox, Sm, Teri, Pza |                                                                                                                                                                                                                        | X        | X        | X        |                                                                                                                                                                                                                        |          |          |
| <b>Adherence (%)</b>             |                                              |                                                                                                                                                                                                                        | U        | 78       | 78       |                                                                                                                                                                                                                        | 97       | U        |
| <b>Point mutations</b>           | - <i>KatG315</i>                             | -                                                                                                                                                                                                                      | +        | +        | +        | -                                                                                                                                                                                                                      | +        | +        |
|                                  | - <i>rpoB531</i>                             | -                                                                                                                                                                                                                      | +        | +        | +        | -                                                                                                                                                                                                                      | +        | +        |
|                                  | - <i>rpsL43</i>                              | -                                                                                                                                                                                                                      | -        | -        | -        | -                                                                                                                                                                                                                      | +        | +        |
|                                  | - <i>rrs513</i>                              | -                                                                                                                                                                                                                      | +        | +        | +        | -                                                                                                                                                                                                                      | -        | -        |
|                                  | - <i>emb306</i>                              | -                                                                                                                                                                                                                      | +        | +        | +        | -                                                                                                                                                                                                                      | -        | -        |
| <b>Strain designation</b>        |                                              | <b>g</b>                                                                                                                                                                                                               | <b>d</b> | <b>d</b> | <b>d</b> | <b>h</b>                                                                                                                                                                                                               | <b>b</b> | <b>b</b> |
| <b>IS6110 DNA fingerprinting</b> |                                              | 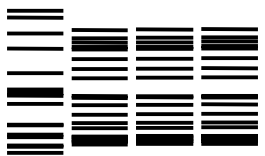                                                                                                                                    |          |          |          |                                                                                                                                     |          |          |
| <b>Strain-specific PCR</b>       |                                              | <p>PCR (strain g)</p>  <p>PCR (strain d)</p>  |          |          |          | <p>PCR (strain h)</p>  <p>PCR (strain b)</p>  |          |          |

Figure E1c

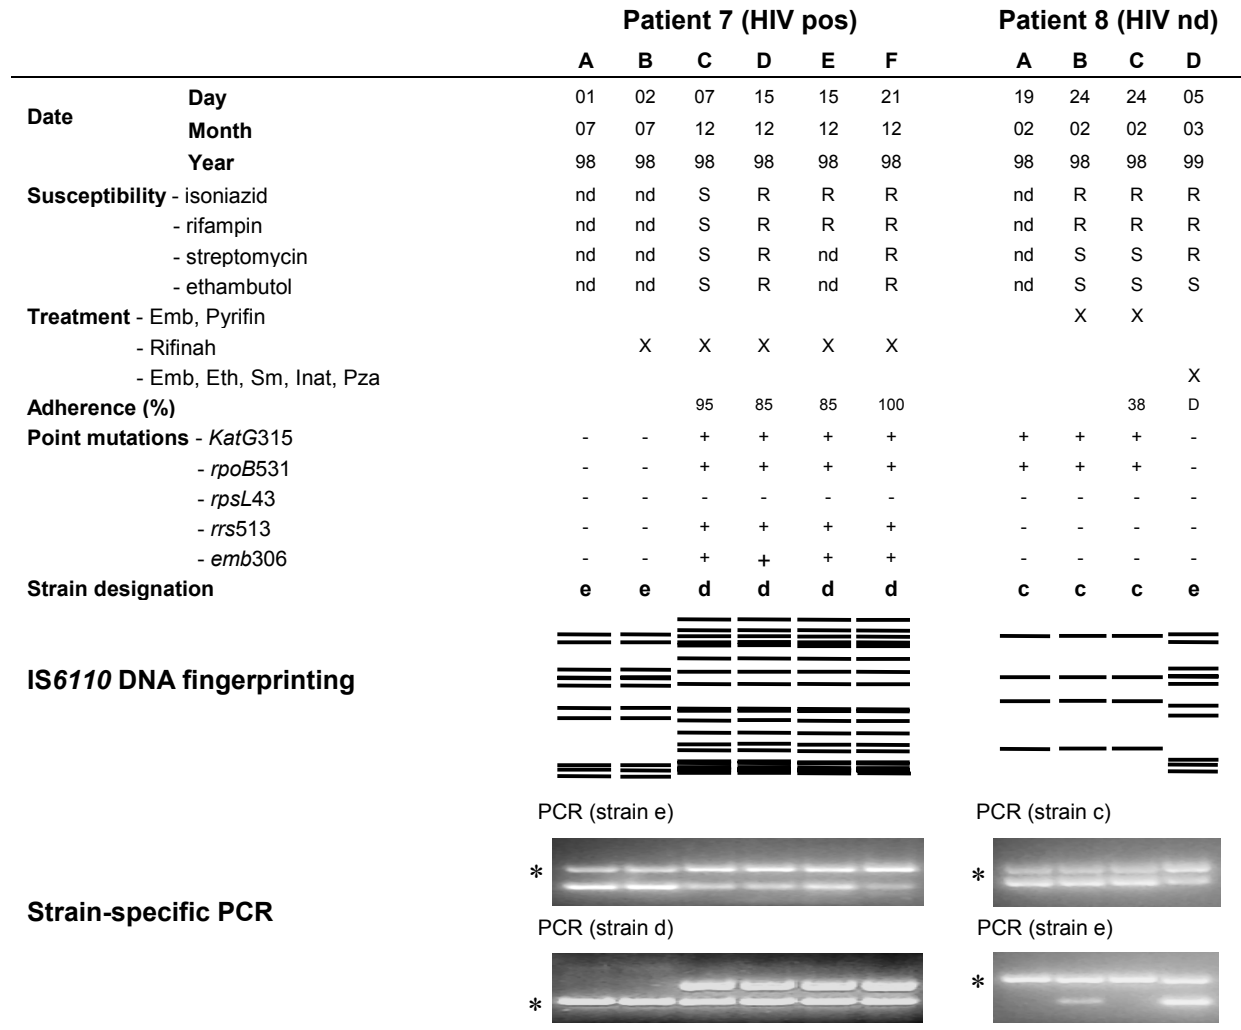

Supplement: supp_172_5_636__1.pdf [file supp_172_5_636__1.pdf]
